# Supplementary material
Source: publisher figshare collection journal article supplement (https://frontiersin.figshare.com/ndownloader/files/27790239)
Supplement: Supplementary file 1 [file 27790239]

Supplementary Material

**Table S1**. Reclassification of the original land cover classes of the CCI maps into six main land cover classes. The reclassification was made using the IPCC classes definition that are expressed in the user guide of the CCI maps (Land Cover CCI PRODUCT USER GUIDE VERSION 2.0 2017).

| **CCI maps land cover original classes** | **Reclassification using IPCC classes** |
| --- | --- |
| Rainfed cropland | Cropland |
| Irrigated cropland |
| Mosaic cropland (>50%) / natural vegetation (tree, shrub, herbaceous cover) (<50%) |
| Mosaic natural vegetation (tree, shrub, herbaceous cover) (>50%) / cropland (< 50%) |
| Tree cover, broadleaved, evergreen, closed to open (>15%) | Forest |
| Tree cover, broadleaved, deciduous, closed to open (> 15%) |
| Tree cover, needleleaved, evergreen, closed to open (> 15%) |
| Tree cover, needleleaved, deciduous, closed to open (> 15%) |
| Tree cover, mixed leaf type (broadleaved and needleleaved) |
| Mosaic tree and shrub (>50%) / herbaceous cover (< 50%) |
| Tree cover, flooded, fresh or brakish water |
| Tree cover, flooded, saline water |
| Mosaic herbaceous cover (>50%) / tree and shrub (<50%) | Grassland |
| Grassland |
| Shrub or herbaceous cover, flooded, fresh-saline or brakish water | Wetland |
| Urban | Urban |
| Shrubland | Other |
| Lichens and mosses |
| Sparse vegetation (tree, shrub, herbaceous cover) |
| Bare areas |
| Water |

**Table S2**. Area (km2) and the percentage (%) of the land use and land cover (LULC) types from 2000 to 2018 in the Baltic countries.

| **LULC types** | **2000** | | **2005** | | **2010** | | **2015** | | **2018** | |
| --- | --- | --- | --- | --- | --- | --- | --- | --- | --- | --- |
| **Area (km2)** | **%** | **Area (km2)** | **%** | **Area (km2)** | **%** | **Area (km2)** | **%** | **Area (km2)** | **%** |
| Cropland | 64508.05 | 36.74 | 64627.55 | 36.80 | 64895.88 | 36.96 | 64514.83 | 36.74 | 63820.12 | 36.34 |
| Forest | 93212.96 | 53.08 | 92510.06 | 52.68 | 91822.65 | 52.29 | 91947.83 | 52.36 | 92496.61 | 52.68 |
| Grassland | 9062.055 | 5.16 | 9341.567 | 5.32 | 9640.463 | 5.49 | 9696.828 | 5.52 | 9782.557 | 5.57 |
| Other | 3758.994 | 2.14 | 3749.907 | 2.14 | 3703.26 | 2.11 | 3709.143 | 2.11 | 3709.879 | 2.11 |
| Urban | 1287.615 | 0.73 | 1490.854 | 0.85 | 1546.851 | 0.88 | 1558.565 | 0.89 | 1589.978 | 0.91 |
| Wetland | 3766.979 | 2.15 | 3876.714 | 2.21 | 3987.552 | 2.27 | 4169.464 | 2.37 | 4197.515 | 2.39 |

**Table S3**. Unaltered area (km2) and the percentage (%) of the land use and land cover (LULC) types compared to the area in 2000.

| **LULC types** | **Area in 2000 (km2)** | **Unaltered area (km2)** | **%** |
| --- | --- | --- | --- |
| Cropland | 64508.1 | 47211.4 | 73.2 |
| Forest | 93213.0 | 67896.7 | 72.8 |
| Grassland | 9062.1 | 2809.4 | 31.0 |
| Other | 3759.0 | 3276.3 | 87.2 |
| Urban | 1287.6 | 1287.6 | 100.0 |
| Wetland | 3767.0 | 2178.6 | 57.8 |

**Table S4.** Number of pixels (Nº of pixels) with significant trend (increase and decrease) and non- significant trend in precipitation in each month according to Mann-Kendal trend test (p ≤ 0.05). Total Sen’s slope precipitation (P SS) for each month per year in mm. The value of mean, standard deviation (SD), maximum (Max) and minimum (Min) of Sen’s slope (SS) for each month in millimeters (mm).

| **Months** | **Increase** | | | | | **Decrease** | | | | | **No trend** | | | | |
| --- | --- | --- | --- | --- | --- | --- | --- | --- | --- | --- | --- | --- | --- | --- | --- |
| **Nº of**  **pixels** | **Mean SS** | **Sd SS** | **Max SS** | **Min SS** | **Nº of**  **pixels** | **Mean SS** | **Sd SS** | **Max SS** | **Min SS** | **Nº of**  **pixels** | **Mean SS** | **Sd SS** | **Max SS** | **Min SS** |
| January | 0 | 0 | 0 | 0 | 0 | 0 | 0 | 0 | 0 | 0 | 2557 | 0.40 | 0.56 | 2.35 | -0.78 |
| February | 0 | 0 | 0 | 0 | 0 | 0 | 0 | 0 | 0 | 0 | 2557 | -0.28 | 0.41 | 0.64 | -1.65 |
| March | 0 | 0 | 0 | 0 | 0 | 20 | -1.66 | 0.16 | -1.28 | -2.00 | 2537 | -0.44 | 0.44 | 0.99 | -2.02 |
| April | 349 | 1.60 | 0.26 | 2.26 | 1.0 | 0 | 0 | 0 | 0 | 0 | 2208 | 1.35 | 0.30 | 2.15 | 0.32 |
| May | 0 | 0 | 0 | 0 | 0 | 0 | 0 | 0 | 0 | 0 | 2557 | -0.32 | 0.75 | 1.97 | -2.40 |
| June | 0 | 0 | 0 | 0 | 0 | 35 | -2.33 | 0.21 | -1.94 | -2.80 | 2522 | -0.76 | 0.80 | 1.80 | -3.40 |
| July | 0 | 0 | 0 | 0 | 0 | 5 | -2.22 | 0.20 | -1.92 | -2.40 | 2552 | -0.19 | 1.46 | 4.38 | -4.27 |
| August | 0 | 0 | 0 | 0 | 0 | 0 | 0 | 0 | 0 | 0 | 2557 | 0.38 | 1.15 | 4.16 | -2.73 |
| September | 80 | 2.37 | 0.29 | 3.27 | 1.6 | 0 | 0 | 0 | 0 | 0 | 2477 | 0.95 | 0.81 | 3.54 | -1.22 |
| October | 0 | 0 | 0 | 0 | 0 | 0 | 0 | 0 | 0 | 0 | 2557 | 0.00 | 0.70 | 3.37 | -1.80 |
| November | 0 | 0 | 0 | 0 | 0 | 0 | 0 | 0 | 0 | 0 | 2557 | -0.10 | 0.66 | 1.65 | -2.44 |
| December | 208 | 1.31 | 0.322 | 2.38 | 0.567 | 0 | 0 | 0 | 0 | 0 | 2349 | 1.03 | 0.46 | 3.30 | -0.10 |

**Table S5**. Number of pixels (Nº of pixels) with significant trend (increase and decrease) and no-trend of precipitation in each season according to Mann-Kendall test (p ≤ 0.05). Total Sen’s slope precipitation (P SS) of each pixel trend per season. The values of mean, standard deviation (SD), maximum (Max) and minimum (Min) refer to Sen’s slope (SS) values of each season in millimeters (mm).

| **Season** | **Increase** | | | | | **Decrease** | | | | | **No trend** | | | | |
| --- | --- | --- | --- | --- | --- | --- | --- | --- | --- | --- | --- | --- | --- | --- | --- |
| **Nº of**  **pixels** | **Mean SS** | **Sd SS** | **Max SS** | **Min SS** | **Nº of pixels** | **Mean SS** | **Sd SS** | **Max SS** | **Min SS** | **Nº of pixels** | **Mean SS** | **Sd SS** | **Max SS** | **Min SS** |
| Autumn | 0 | 0 | 0 | 0 | 0 | 0 | 0 | 0 | 0 | 0 | 2577 | 0.5 | 1.7 | 7.9 | -4.6 |
| Spring | 4 | 1.40 | 0.24 | 1.68 | 1.1 | 31 | -1.34 | 0.16 | -1.07 | -1.64 | 2522 | 0.32 | 1.0 | 4.2 | -2.2 |
| Summer | 0 | 0 | 0 | 0 | 0 | 0 | 0 | 0 | 0 | 0 | 2557 | -0.91 | 1.6 | 6.8 | -7.3 |
| Winter | 7 | 5.63 | 2.67 | 8.37 | 2.7 | 0 | 0 | 0 | 0 | 0 | 2550 | 1.48 | 1.4 | 8.9 | -1.7 |

**Table S6**. Annual number of pixels (Nº of pixels) with significant trends (increase and decrease) and no-trends of precipitation accordingly to Mann-Kendal trend test (p ≤ 0.05). Total Sen’s slope precipitation (P SS) of each pixel trend. The values of mean, standard deviation (SD), maximum (Max) and minimum (Min) refer to Sen’s slope (SS) values in millimeters (mm).

|  | **No trend** | | | | |
| --- | --- | --- | --- | --- | --- |
| **Nº of pixels** | **Mean SS** | **Sd SS** | **Max SS** | **Min SS** |
| Annual | 2557 | 1.44 | 3.73 | 20.25 | -9.61 |


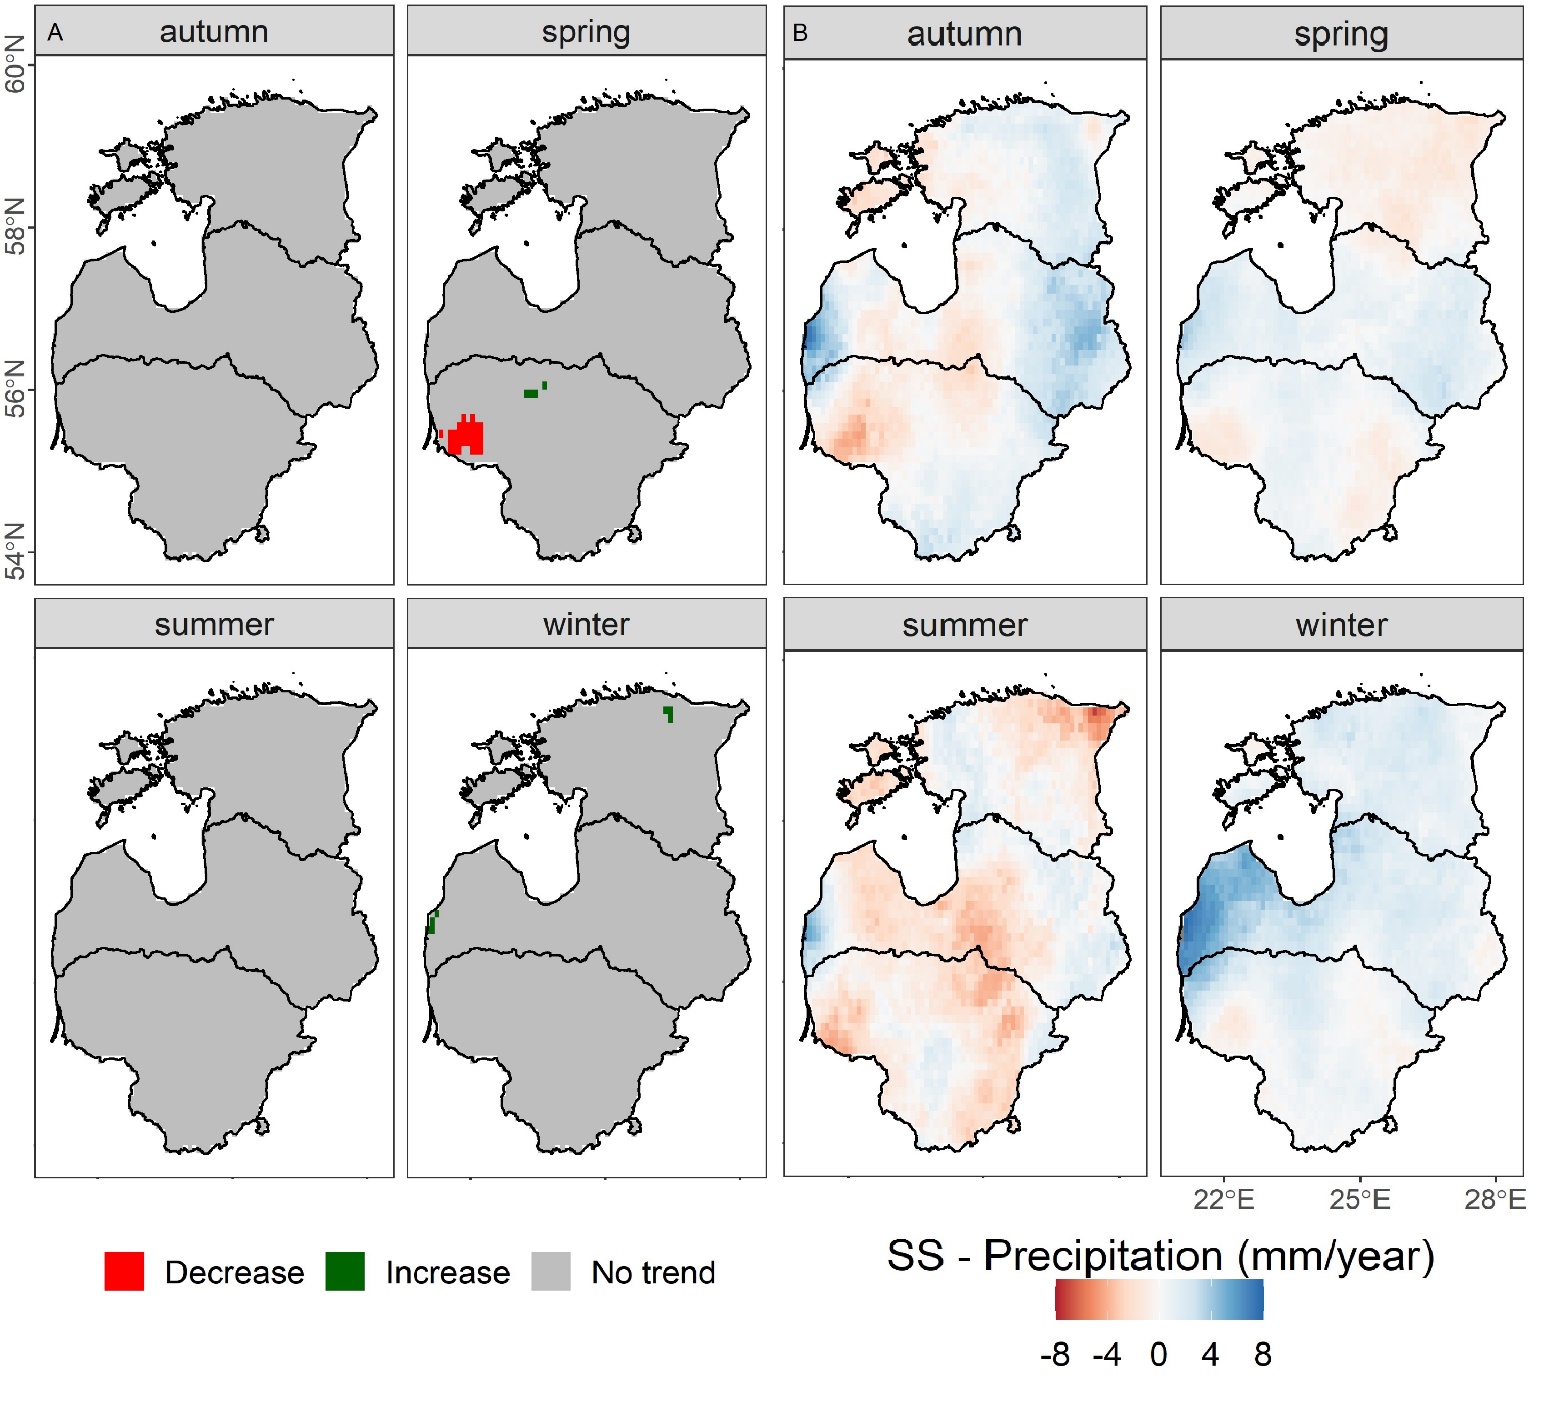


**Figure S1**. A) Mann-Kendal trend analysis for the autumn, spring, summer and winter seasons based on precipitation values. B) Sen’s slope values for autumn, spring, summer and winter seasons calculated based on the precipitation values.


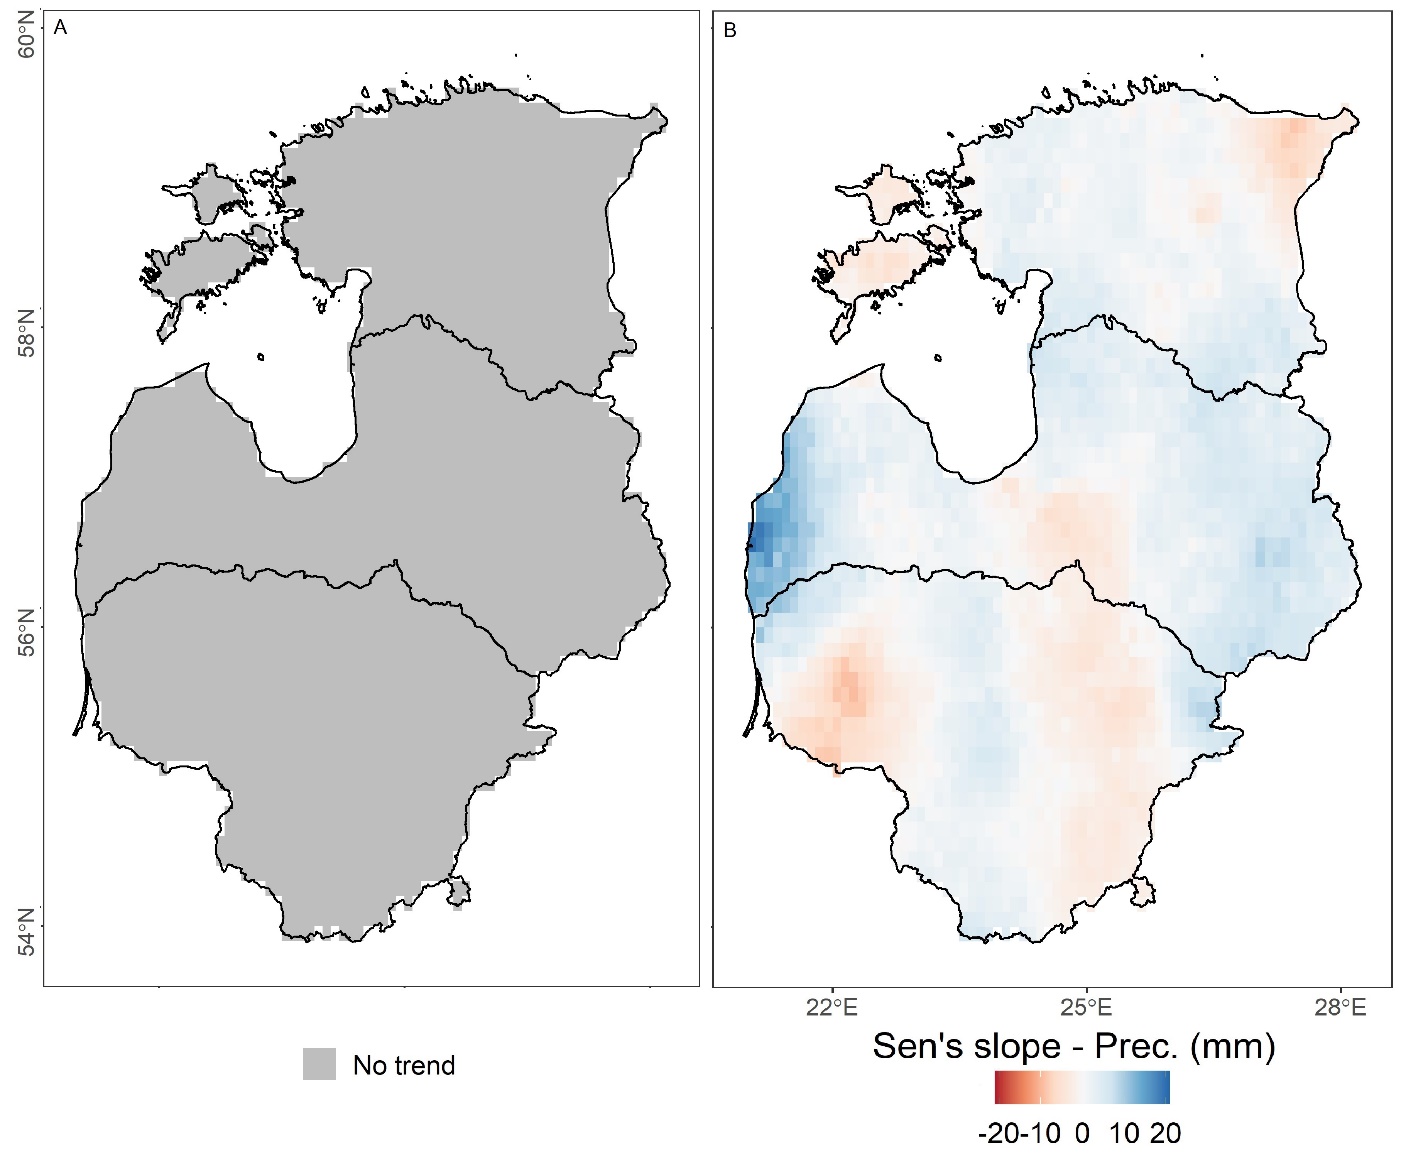


**Figure S2**. A) Mann-Kendal trend analysis for annual precipitation values. B) Sen’s slope (SS) values calculated based on the annual precipitation values.


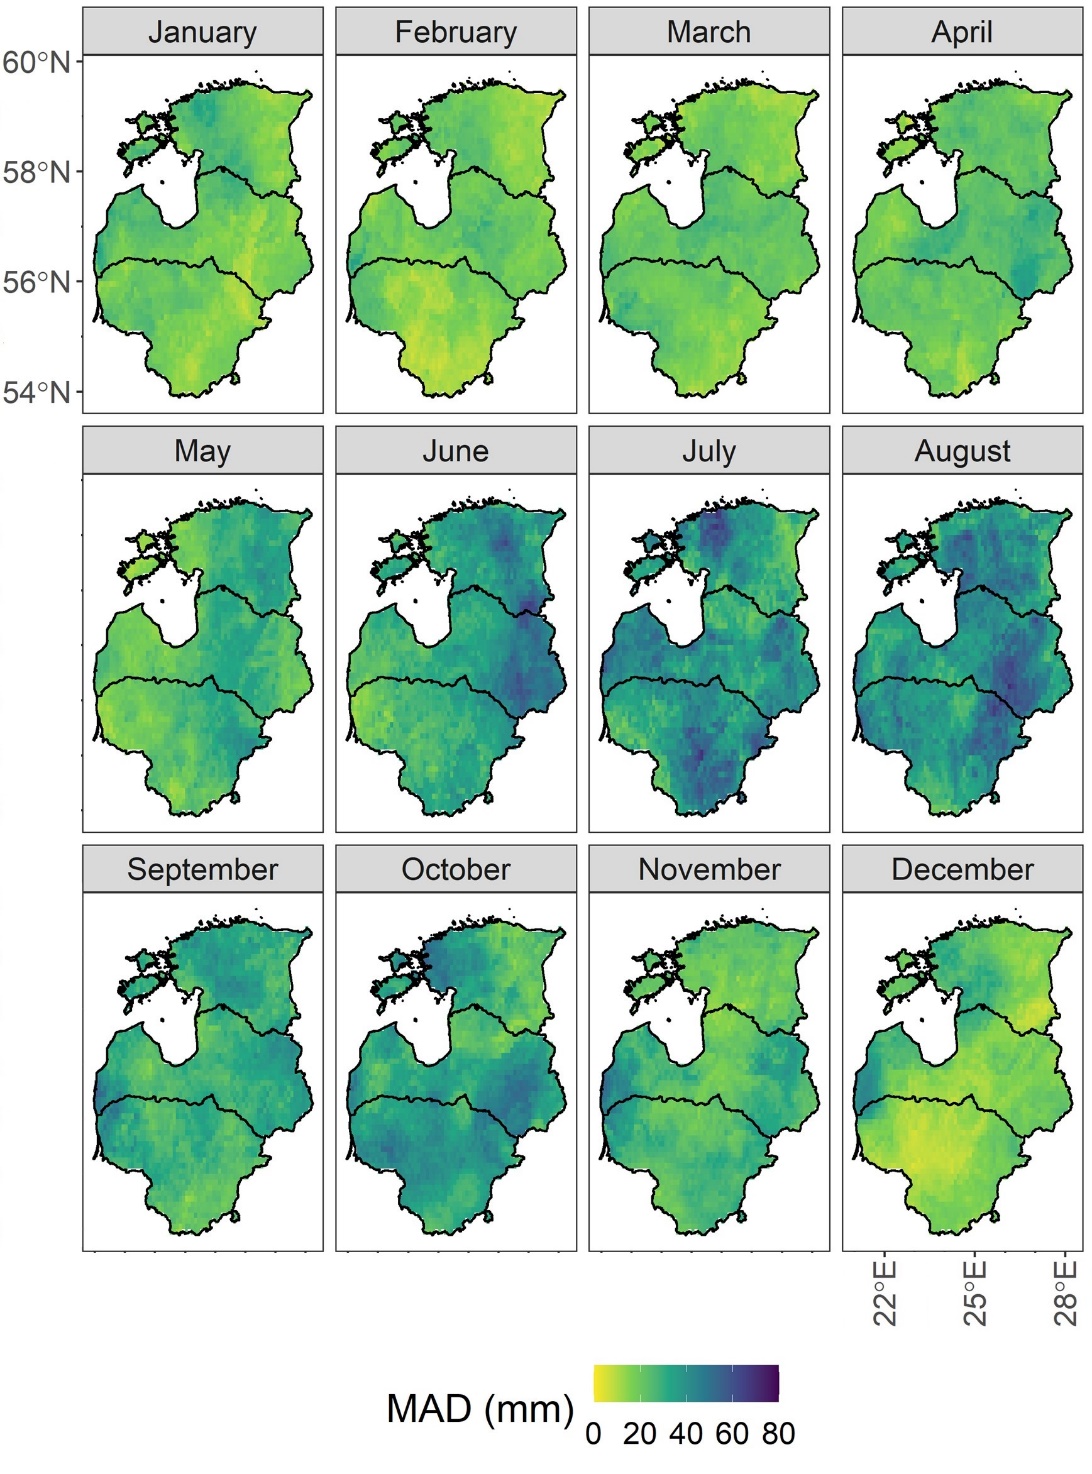


**Figure S3**. Median absolute deviation for monthly precipitation.

**Table S7**. Number of pixels with significant trends (increase) and no-trends of temperature in each month accordingly to Mann-Kendal trend test (p ≤ 0.05). The values of mean, standard deviation (SD), maximum (Max) and minimum (Min) refer to Sen’s slope (SS) values of each month.

| **Month** | **Increase** | | | | | | **No trend** | | | | |
| --- | --- | --- | --- | --- | --- | --- | --- | --- | --- | --- | --- |
| **Nº of pixels** | **Mean SS** | **Sd SS** | **Max SS** | **Min SS** | **Nº of pixels** | | **Mean SS** | **Sd SS** | **Max SS** | **Min SS** |
| January | 0 | 0 | 0 | 0 | 0 | 2557 | | -0.07 | 0.02 | 0.00 | -0.12 |
| February | 0 | 0 | 0 | 0 | 0 | 2557 | | -0.01 | 0.03 | 0.09 | -0.07 |
| March | 0 | 0 | 0 | 0 | 0 | 2557 | | 0.07 | 0.02 | 0.14 | 0.00 |
| April | 0 | 0 | 0 | 0 | 0 | 2557 | | -0.01 | 0.02 | 0.09 | -0.07 |
| May | 159 | 0.14 | 0.03 | 0.17 | 0.07 | 2398 | | 0.08 | 0.03 | 0.16 | 0.00 |
| June | 118 | 0.10 | 0.01 | 0.13 | 0.08 | 2439 | | 0.06 | 0.03 | 0.12 | -0.02 |
| July | 0 | 0 | 0 | 0 | 0 | 2557 | | -0.01 | 0.0 | 0.1 | -0.1 |
| August | 424 | 0.10 | 0.0 | 0.1 | 0.1 | 2133 | | 0.06 | 0.02 | 0.11 | 0.00 |
| September | 2285 | 0.13 | 0.02 | 0.20 | 0.1 | 272 | | 0.09 | 0.0 | 0.1 | 0.0 |
| October | 0 | 0 | 0 | 0 | 0 | 2557 | | -0.03 | 0.03 | 0.05 | -0.09 |
| November | 0 | 0 | 0 | 0 | 0 | 2557 | | 0.07 | 0.02 | 0.14 | 0.02 |
| December | 0 | 0 | 0 | 0 | 0 | 2557 | | 0.10 | 0.02 | 0.17 | 0.03 |

**Table S8**.Number of pixels with significant trends (increase) and no-trends of temperature in each season accordingly to Mann-Kendal trend test (p ≤ 0.05). The values of mean, standard deviation (SD), maximum (Max) and minimum (Min) refer to Sen’s slope (SS) values of each season.

| **Season** | **Increase** | | | | | | **No trend** | | | | |
| --- | --- | --- | --- | --- | --- | --- | --- | --- | --- | --- | --- |
| **Nº of pixels** | **Mean SS** | **Sd SS** | **Max SS** | **Min SS** | **Nº of pixels** | | **Mean SS** | **Sd SS** | **Max SS** | **Min SS** |
| Autumn | 170 | 0.11 | 0.01 | 0.13 | 0.07 | 2387 | | 0.06 | 0.02 | 0.12 | 0.00 |
| Spring | 0 | 0 | 0 | 0 | 0 | 2557 | | 0.05 | 0.02 | 0.10 | -0.02 |
| Summer | 0 | 0 | 0 | 0 | 0 | 2557 | | 0.04 | 0.02 | 0.11 | -0.03 |
| Winter | 0 | 0 | 0 | 0 | 0 | 2557 | | 0.07 | 0.02 | 0.14 | 0.02 |

**Table S9.**Number of pixels with significant trends (increase) and no-trends of temperature for the annual analysis accordingly to Mann-Kendal trend test (p ≤ 0.05). The values of mean, standard deviation (SD), maximum (Max) and minimum (Min) refer to Sen’s slope (SS) values.

|  | **Increase** | | | | | | **No trend** | | | | |
| --- | --- | --- | --- | --- | --- | --- | --- | --- | --- | --- | --- |
| **Nº of pixels** | **Mean SS** | **Sd SS** | **Max SS** | **Min SS** | **Nº of pixels** | | **Mean SS** | **Sd SS** | **Max SS** | **Min SS** |
| Annual | 813 | 0.07 | 0.01 | 0.09 | 0.04 | 1444 | | 0.05 | 0.01 | 0.08 | 0.02 |


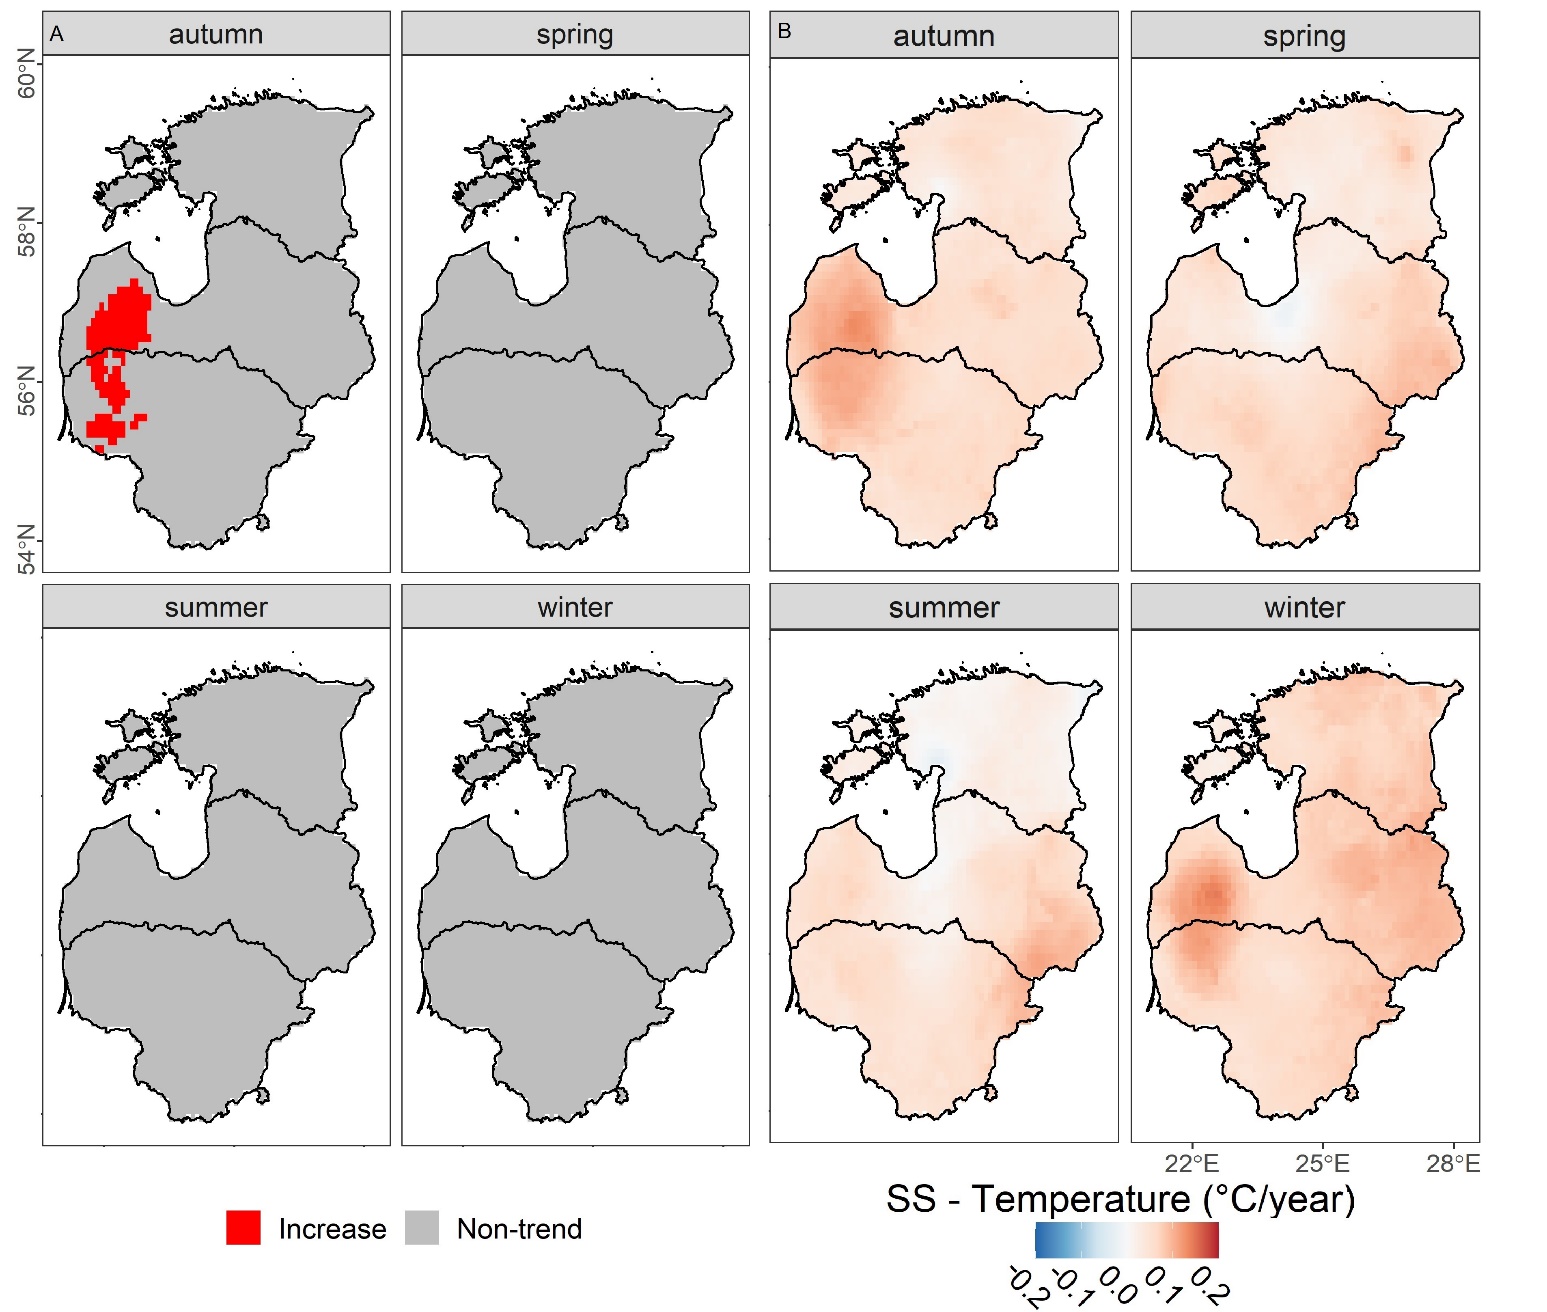


**Figure S4.** A) Mann-Kendal trend analysis based on the mean temperature values for the autumn, spring, summer and winter seasons. B) Sen’s slope values for autumn, spring, summer and winter seasons calculated based on the mean temperature values.

**
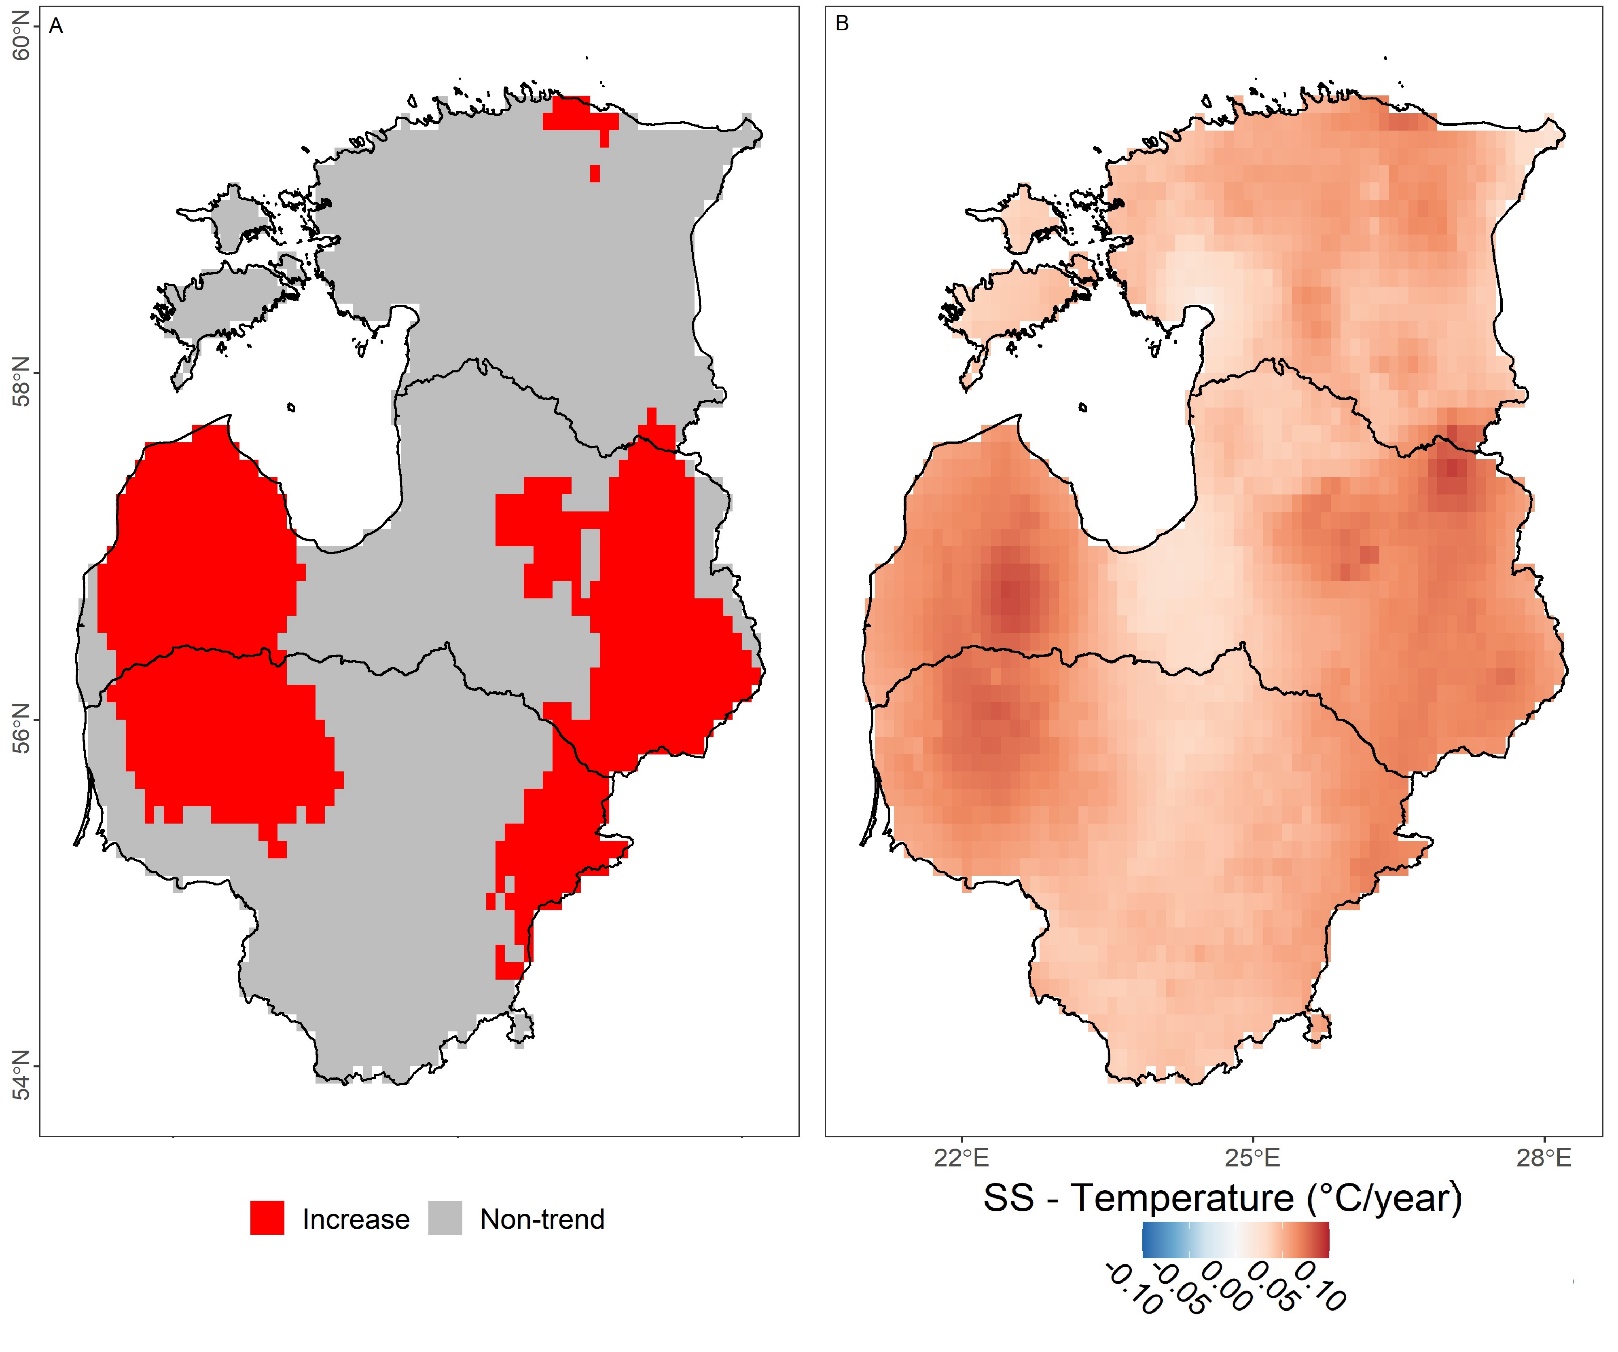
**

**Figure S5**. A) Mann-Kendal trend analysis based on the annual mean temperature value. B) Sen’s slope values calculated based on the annual mean temperature values.

**Table S10**.Number of pixels (Nº of pixels) with significant trends (increase and decrease) and no-trends of evapotranspiration (ET) in each month accordingly to Mann-Kendal trend test (p ≤ 0.05). Sen’s slope sum evapotranspiration (ET SS). The values of average (av), standard deviation (SD), maximum (Max) and minimum (Min) refer to Sen’s slope (SS) values of each month in millimeters (mm) per year.

| **Month** | **Increase** | | | | | **Decrease** | | | | | **No trend** | | | | |
| --- | --- | --- | --- | --- | --- | --- | --- | --- | --- | --- | --- | --- | --- | --- | --- |
| **Nº de pixels** | **Mean**  **SS** | **Sd**  **SS** | **Max**  **SS** | **Min**  **SS** | **Nº de pixels** | **Mean**  **SS** | **Sd**  **SS** | **Max**  **SS** | **Min**  **SS** | **Nº de pixels** | **Mean**  **SS** | **Sd**  **SS** | **Max**  **SS** | **Min**  **SS** |
| March | 31318 | 0.27 | 0.11 | 0.90 | 0.06 | 823 | -0.22 | 0.05 | -0.10 | -0.38 | 1391171 | 0.07 | 0.11 | 0.72 | -0.43 |
| April | 18210 | 0.49 | 0.15 | 1.31 | 0.15 | 34150 | -0.43 | 0.10 | -0.13 | -1.02 | 1370952 | 0.06 | 0.20 | 1.08 | -0.75 |
| May | 329518 | 1.41 | 0.50 | 4.87 | 0.23 | 1216 | -1.06 | 0.41 | -0.22 | -2.84 | 1092578 | 0.71 | 0.46 | 3.18 | -1.88 |
| June | 129864 | 1.69 | 0.67 | 6.43 | 0.30 | 2351 | -1.57 | 0.59 | -0.28 | -4.77 | 1291097 | 0.57 | 0.56 | 5.25 | -3.36 |
| July | 32430 | 1.94 | 0.85 | 6.67 | 0.34 | 12299 | -1.65 | 0.61 | -0.36 | -6.16 | 1378583 | 0.00 | 0.60 | 5.34 | -4.05 |
| August | 132805 | 1.24 | 0.53 | 5.19 | 0.21 | 43114 | -0.99 | 0.38 | -0.16 | -4.23 | 1247393 | 0.15 | 0.47 | 3.45 | -3.55 |
| September | 216488 | 0.65 | 0.31 | 3.05 | 0.09 | 864 | -0.59 | 0.24 | -0.13 | -1.37 | 1205960 | 0.21 | 0.20 | 1.85 | -1.54 |
| October | 25385 | 0.27 | 0.13 | 1.18 | 0.04 | 51 | -0.19 | 0.08 | -0.09 | -0.41 | 1397876 | 0.03 | 0.06 | 0.82 | -0.40 |
| November | 3586 | 0.25 | 0.11 | 0.89 | 0.05 | 135439 | -0.14 | 0.03 | -0.04 | -0.47 | 1284287 | -0.05 | 0.07 | 0.54 | -0.43 |

**Table S11**.Number of pixels (Nº of pixels) with significant trends (increase and decrease) and no-trends of evapotranspiration (ET) in each season accordingly to Mann-Kendal trend test (p ≤ 0.05). Total Sen’s slope precipitation (ET SS) per season. The values of mean, standard deviation (SD), maximum (Max) and minimum (Min) refer to Sen’s slope (SS) values of each season in millimeters (mm) per year.

| **Season** | **Increase** | | | | | | **Decrease** | | | | | **No trend** | | | | |
| --- | --- | --- | --- | --- | --- | --- | --- | --- | --- | --- | --- | --- | --- | --- | --- | --- |
| **Nº de**  **pixels** | **Mean** | **Sd** | **Max** | **Min** | **Nº de**  **pixels** | | **Mean** | **Sd** | **Max** | **Min** | **Nº de**  **pixels** | **Mean** | **Sd** | **Max** | **Min** | |
| autumn | 184524 | 0.81 | 0.40 | 3.94 | 0.13 | 922 | | -0.63 | 0.26 | -0.19 | -1.86 | 1237866 | 0.24 | 0.23 | 2.56 | -1.51 | |
| spring | 192119 | 1.81 | 0.59 | 5.38 | 0.42 | 122 | | -1.22 | 0.46 | -0.54 | -2.69 | 1231071 | 0.90 | 0.53 | 3.80 | -2.11 | |
| summer | 142206 | 3.32 | 1.72 | 17.86 | 0.66 | 10082 | | -3.08 | 1.25 | -0.47 | -15.69 | 1271024 | 0.64 | 1.11 | 10.68 | -6.20 | |

**Table S12**.Number of pixels with significant trends (increase) and no-trends of temperature for the annual analysis accordingly to Mann-Kendal trend test (p ≤ 0.05). The values of mean, standard deviation (SD), maximum (Max) and minimum (Min) refer to Sen’s slope (SS) values.

|  | **Increase** | | | | | **Decrease** | | | | | **No trend** | | | | | |
| --- | --- | --- | --- | --- | --- | --- | --- | --- | --- | --- | --- | --- | --- | --- | --- | --- |
| **Nº de pixels** | **Av** | **Sd** | **Max** | **Min** | **Nº de pixels** | **Av** | **Sd** | **Max** | **Min** | **Nº de pixels** | **Av** | **Sd** | **Max** | **Min** |
| Annual | 495940 | 4.42 | 1.85 | 24.82 | 0.73 | 4323 | -3.69 | 1.64 | -0.86 | -17.98 | 923049 | 1.67 | 1.38 | 13.19 | -7.62 |


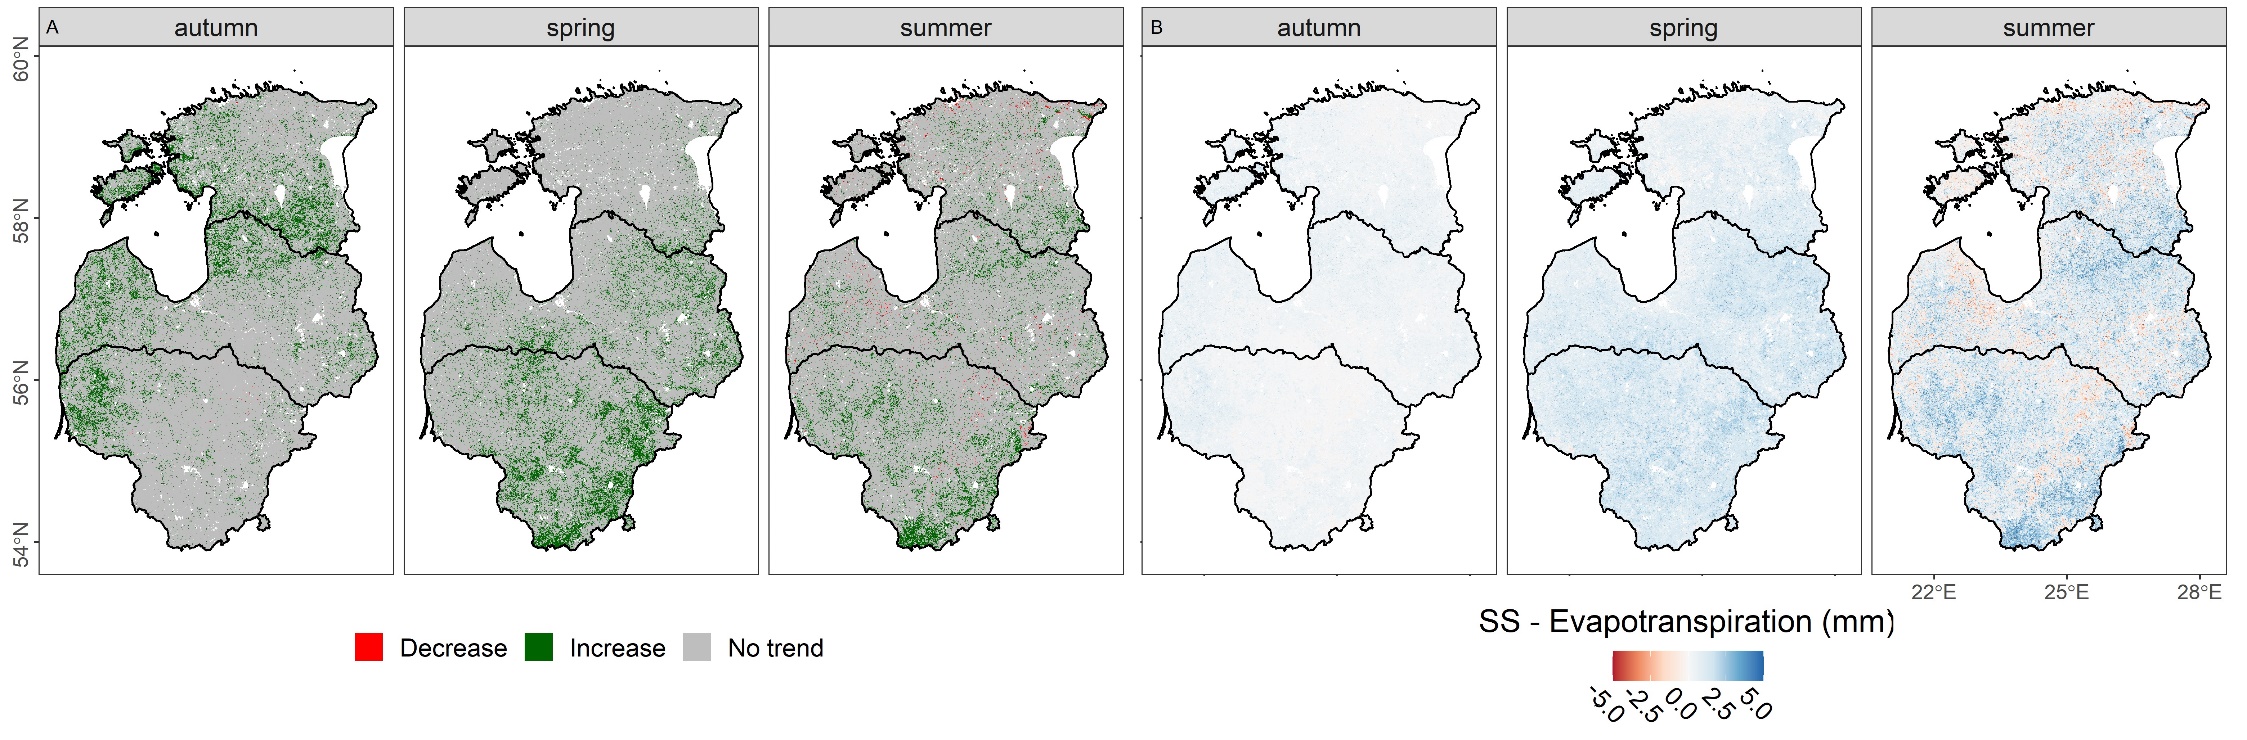


**Figure S6**. A) Mann-Kendal trend analysis based on the seasonal evapotranspiration. B) Sen’s slope values calculated based on the seasonal evapotranspiration values.


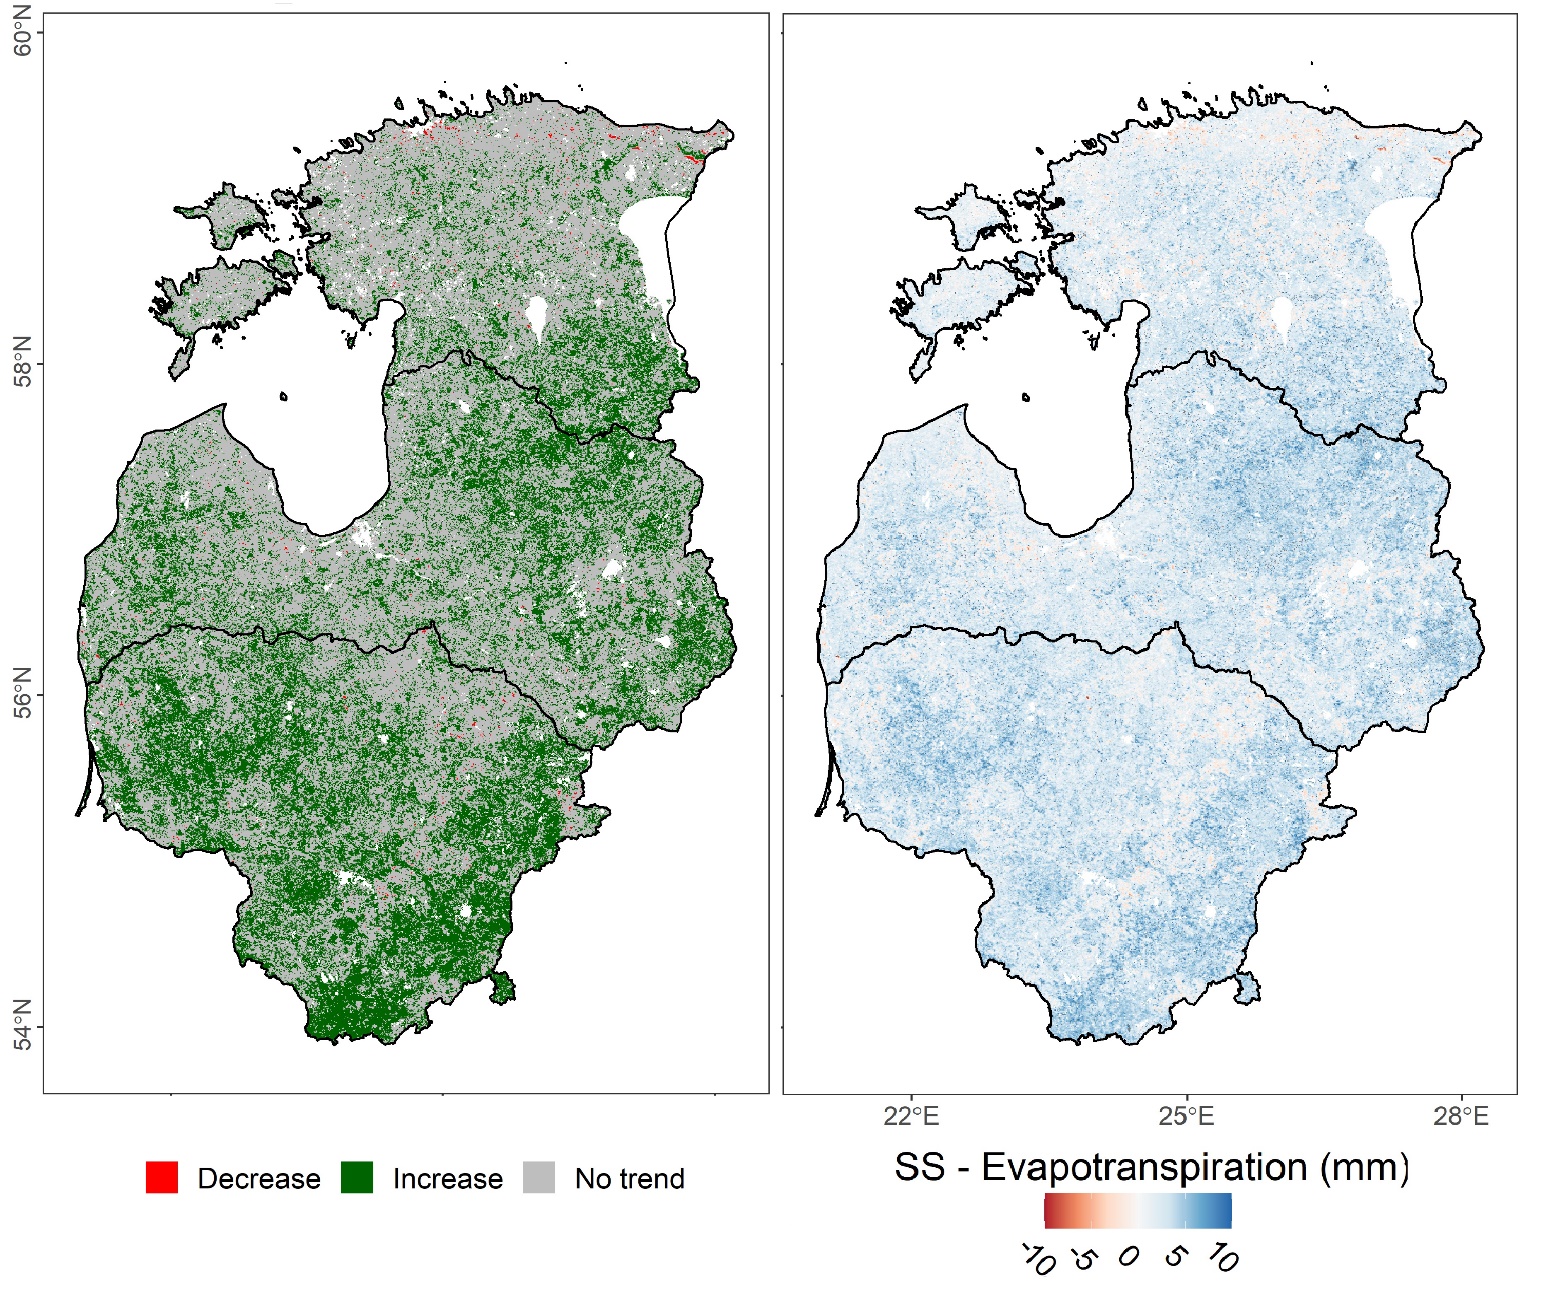


**Figure S7**. A) Mann-Kendal trend analysis based on the annual evapotranspiration. B) Sen’s slope (SS) values calculated based on the annual evapotranspiration values.

*
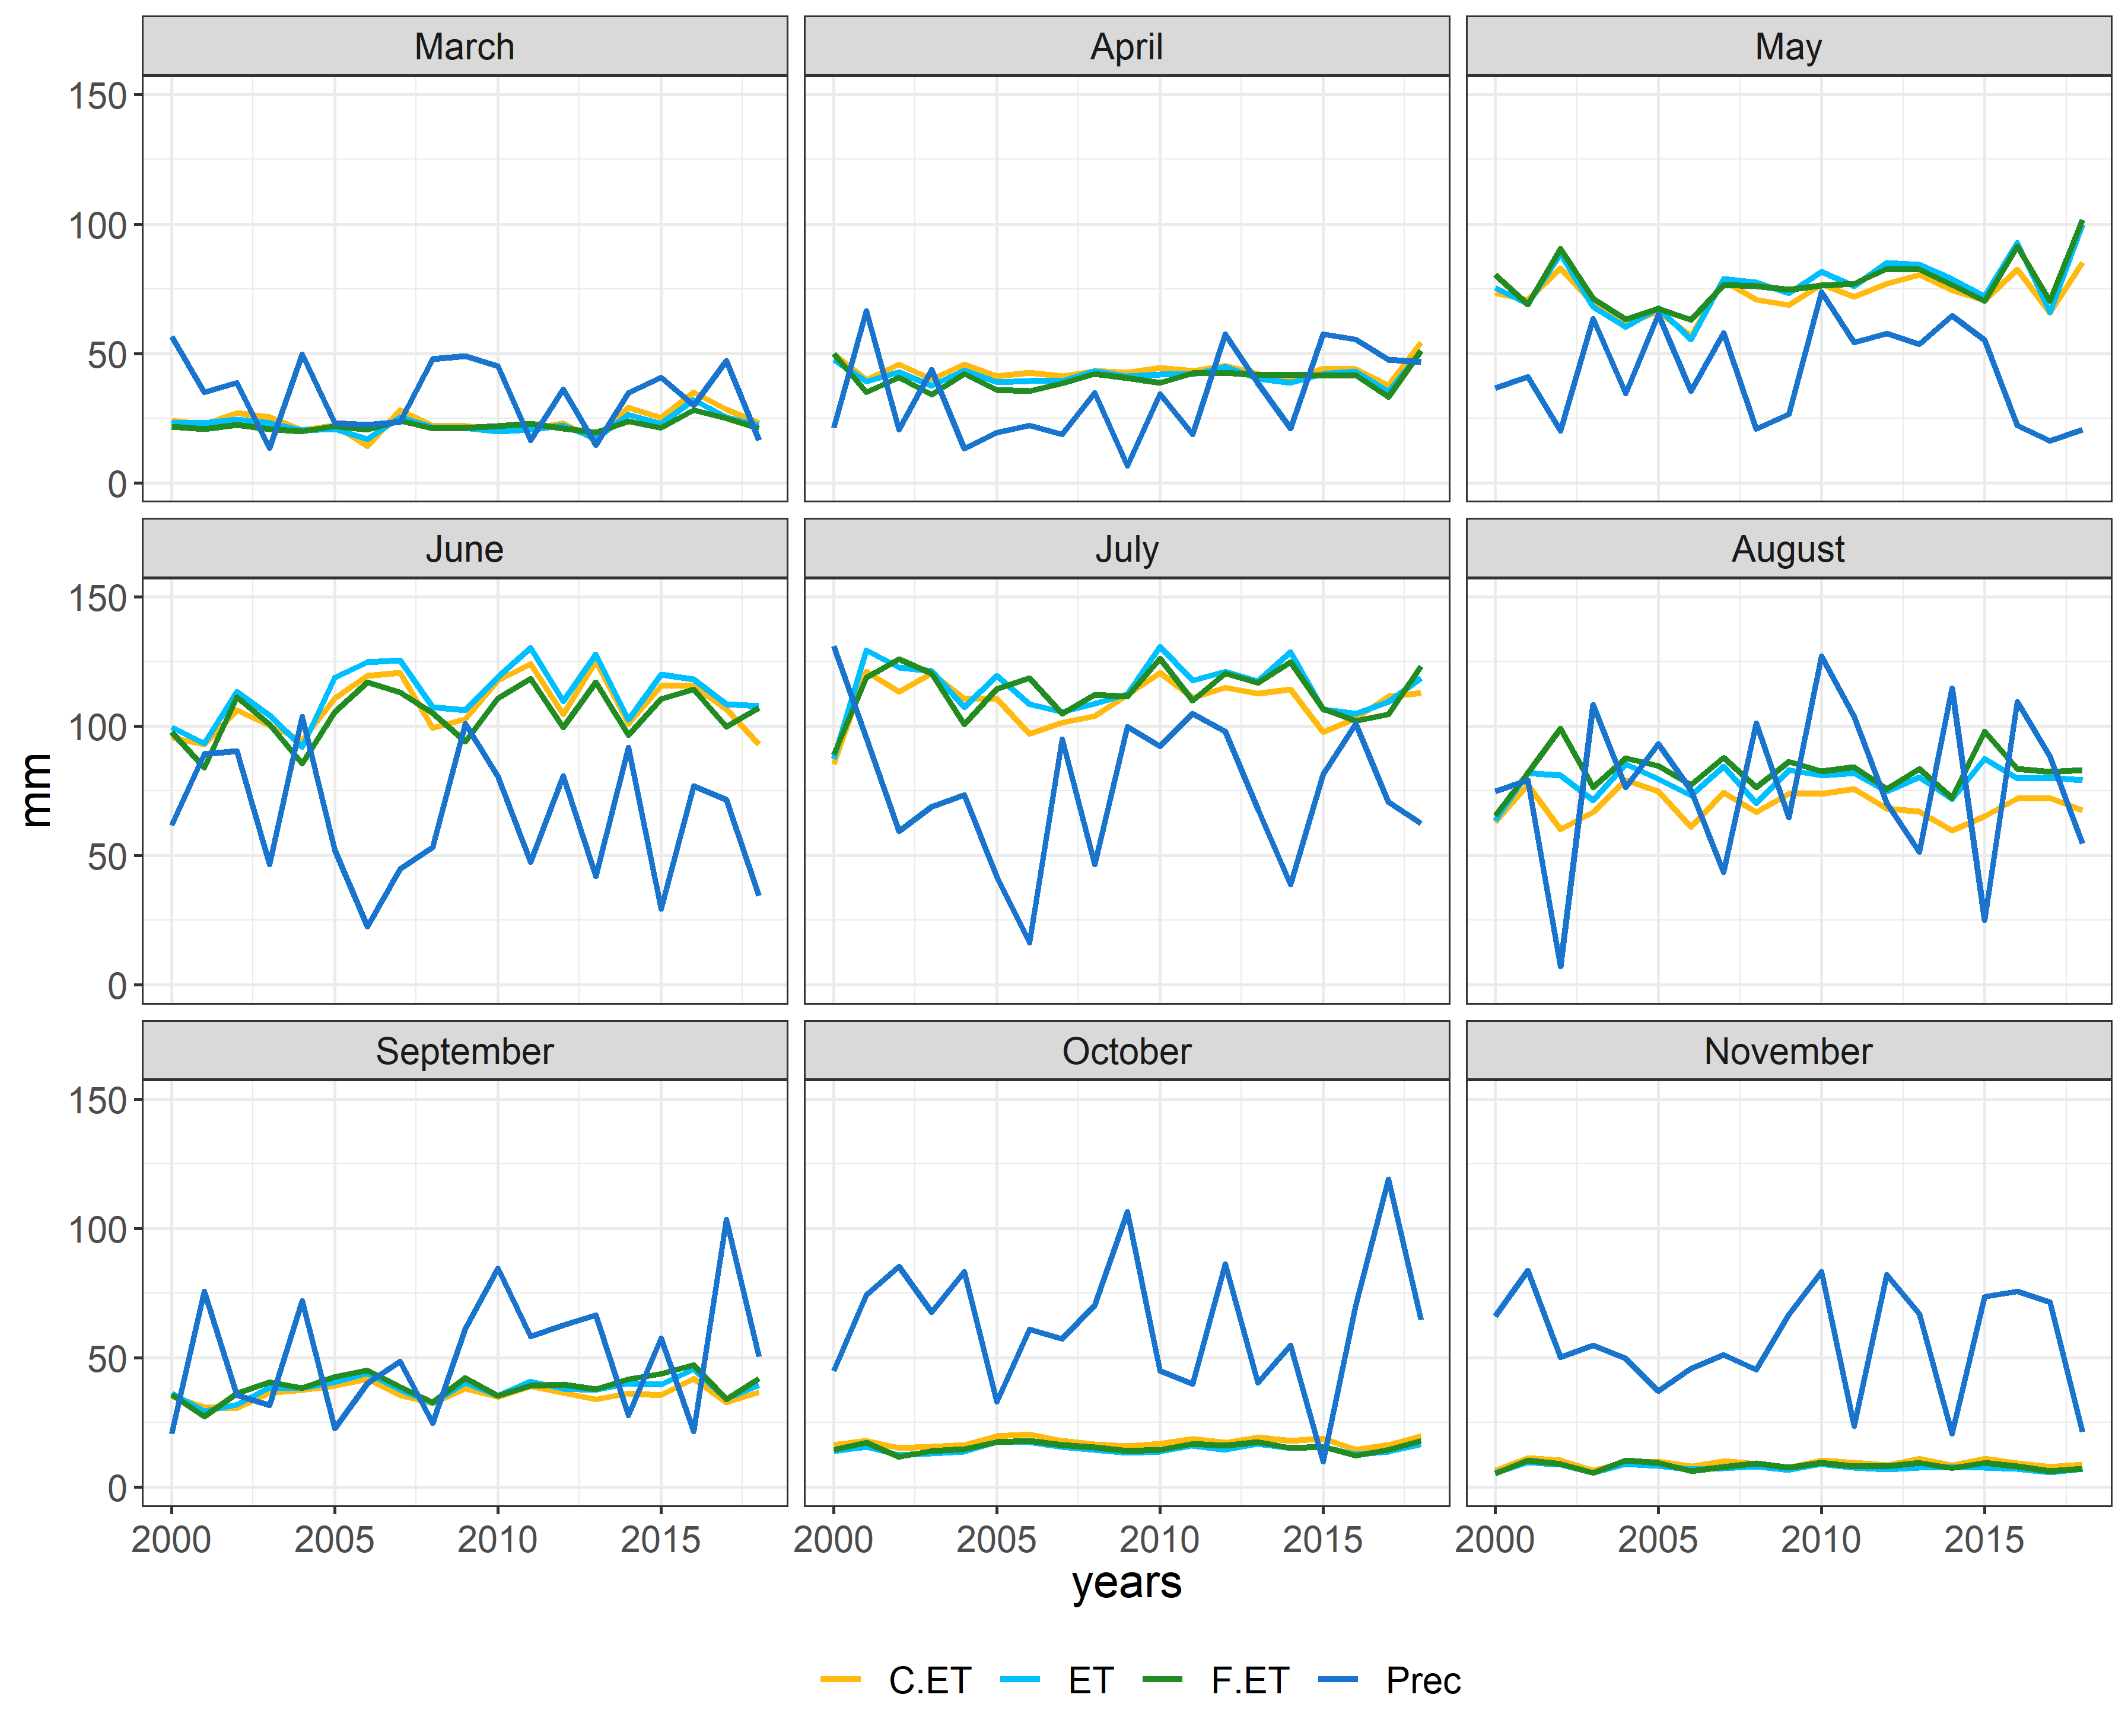
*

**Figure S8**. Monthly ET (mm) average for crop (C.ET), for forest (F.ET) and for the entire region (ET). Montly mean precipitation (Prec) for the entire study area.

**Table S13.**Sen’s slope (SS) values for forest and croplands in each month.

| **Month** | **Crop** | **Forest** |
| --- | --- | --- |
| **SS (mm)** | **SS (mm)** |
| March | 0.13 | 0.07 |
| April | 0.03 | 0.17 |
| May | 0.50 | 0.70 |
| June | 0.64 | 0.55 |
| July | 0.06 | -0.07 |
| August | -0.20 | -0.02 |
| September | 0.10 | 0.35 |
| October | 0.08 | 0.04 |
| November | -0.01 | -0.05 |

**Table S14**. Sen’s slope (SS) values for forest and croplands in each season. Significant trend (p<0.05) are indicated by *.

| **Season** | **Crop** | **forest** |
| --- | --- | --- |
| **SS (mm)** | **SS (mm)** |
| autumn | 0.3 | 0.46* |
| spring | 0.71 | 1.05 |
| summer | 0.21 | 0.9 |
